# Supplementary material
Source: PubMed Central journal article supplement (PMC3732435)
Supplement: Supp_Table1.pdf [file Supp_Table1.pdf]

## Supplementary Data

SUPPLEMENTARY TABLE S1. PRIMERS AND PROBES USED IN TAQMAN GENOTYPING

| <i>SNPs</i> | <i>Primers and probes</i> | <i>Sequence (5'-3')</i>       |
|-------------|---------------------------|-------------------------------|
| rs2072454   | Forward primer of PCR     | GTTCTGGAAGTCCATCGACATG        |
|             | Reverse primer of PCR     | ATGGGAATTTAAAGGAGCTGGA        |
|             | FAM-labeled G allele      | TGGATGCTCTCCACgTTGCAC         |
| rs2227983   | HEX-labeled A allele      | TGGATGCTCTCCACaTTGCACA        |
|             | Forward primer of PCR     | TCTGCCATGCCTTGTGCT            |
|             | Reverse primer of PCR     | CACGCATTCCCTGCCTC             |
| rs17337023  | FAM-labeled G allele      | AGCCCAgGGACTGCGTCTCTT         |
|             | HEX-labeled A allele      | AGCCCAaGGACTGCGTCTCTTG        |
|             | Forward primer of PCR     | CCAATCCAACATCCAGACACA         |
| rs1050171   | Reverse primer of PCR     | CTTACCCATTTCGTTGGACAGC        |
|             | FAM-labeled T allele      | CTACAGATGCACtGGGCCAGGT        |
|             | HEX-labeled A allele      | CTACAGATGCACaGGGCCAGGT        |
| rs2293347   | Forward primer of PCR     | CTGCTGGGCATCTGCCTC            |
|             | Reverse primer of PCR     | CGGACATAGTCCAGGAGCA           |
|             | FAM-labeled G allele      | CCTCCACCGTGCAgCTCATCAC        |
| rs884225    | HEX-labeled A allele      | ACCGTGCAaCTCATCACGCAGC        |
|             | Forward primer of PCR     | AAGAAGTGAATAGCATCTCTACG       |
|             | Reverse primer of PCR     | CACGTCGTCCATGCTTCTT           |
| rs11569017  | FAM-labeled C allele      | AAGTCCTACAGAcTCCAACCTTCTACCGT |
|             | HEX-labeled T allele      | AAGTCCTACAGAtTCCAACCTTCTACCGT |
|             | Forward primer of PCR     | CTGTGTTGTCTTCCATTCCATIG       |
| rs4444903   | Reverse primer of PCR     | GATGTGTCATCCTCTCTTGCTGA       |
|             | FAM-labeled C allele      | TCAGTATGCcGCCCCTGTCTT         |
|             | HEX-labeled T allele      | CAGTATGCtGCCCCTGTCTTGC        |
| rs11569017  | Forward primer of PCR     | CAACGTTAGGTAATTTGCCACATAA     |
|             | Reverse primer of PCR     | TGAAGGTTTTATGAAAGCCTCAGA      |
|             | FAM-labeled A allele      | CAACAGCTGATGACCAaCCAGAGCC     |
| rs4444903   | HEX-labeled T allele      | CAACAGCTGATGACCAtCCAGAGCC     |
|             | Forward primer of PCR     | AGCAAGGCAAAGGCTTAGAGAG        |
|             | Reverse primer of PCR     | AGAGAAACTGTTGGGAGAGGAATC      |
| rs4444903   | FAM-labeled T allele      | AAGTTCCAGCtACAACCCTTGGATTGG   |
|             | HEX-labeled C allele      | AAGTTCCAGCcACAACCCTTGGATT     |

SNPs, single-nucleotide polymorphisms; PCR, polymerase chain reaction.
