# Supplementary material
Source: PubMed Central journal article supplement (PMC3732435)
Supplement: Supp_Table2.pdf [file Supp_Table2.pdf]

SUPPLEMENTARY TABLE S2. CLINICAL FEATURES  
OF THE SUBJECTS INCLUDED IN THE STUDY

| <i>Sample profile</i> | <i>Case, n=416 (%)</i> | <i>Control, n=645 (%)</i> | <i>p-Value</i> |
|-----------------------|------------------------|---------------------------|----------------|
| Age                   | 54.5 ± 10.36           | 39.3 ± 6.90               | <0.001         |
| Gender                |                        |                           |                |
| Male                  | 352 (84.6)             | 522 (80.9)                | 0.124          |
| Female                | 64 (15.4)              | 123 (19.1)                |                |
| Smoking               |                        |                           |                |
| Yes                   | 154 (45.6)             | 234 (36.3)                | 0.005          |
| No                    | 184 (54.4)             | 411 (63.7)                |                |
| Drinking              |                        |                           |                |
| Yes                   | 177 (52.4)             | 248 (38.4)                | <0.001         |
| No                    | 161 (47.6)             | 397 (61.6)                |                |
